# Supplementary material for: GC-MS Discrimination of Citrulline from Ornithine and Homocitrulline from Lysine by Chemical Derivatization: Evidence of Formation of N5-Carboxy-ornithine and N6-Carboxy-lysine
Source: MDPI journal article supplement (doi:10.3390/molecules26082301), 2021-04-15

# GC-MS Discrimination of Citrulline from Ornithine and Homocitrulline from Lysine by Chemical Derivatization: Evidence of Formation of $N^5$ -Carboxy-ornithine and $N^6$ -Carboxy-lysine

Svetlana Baskal, Alexander Bollenbach and Dimitrios Tsikas \*

Institute of Toxicology, Core Unit Proteomics, Hannover Medical School, *Hannover* 30625, Germany; baskal.svetlana@mh-hannover.de (S.B.); bollenbach.alex@gmail.com (A.B.)

\* Correspondence: Tsikas.dimitrios@mh-hannover.de

**Citation:** Baskal, S.; Bollenbach, A.; Tsikas, D. GC-MS Discrimination of Citrulline from Ornithine and Homocitrulline from Lysine by Chemical Derivatization: Evidence of Formation of  $N^5$ -Carboxy-ornithine and  $N^6$ -Carboxy-lysine. *Molecules* **2021**, *26*, 2301. <https://doi.org/10.3390/molecules26082301>

Academic Editor: Paraskevas D. Tzanavaras  
Received: 24 March 2021  
Accepted: 13 April 2021  
Published: date

**Publisher's Note:** MDPI stays neutral with regard to jurisdictional claims in published maps and institutional affiliations.

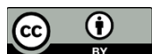

**Copyright:** © 2021 by the authors. Licensee MDPI, Basel, Switzerland. This article is an open access article distributed under the terms and conditions of the Creative Commons Attribution (CC BY) license (<http://creativecommons.org/licenses/by/4.0/>).

**Figure S1.** Separate derivatization of citrulline and homocitrulline (5 nmol each) by procedure B, i.e., first with PFPA/EA and then 2 M HCl/CH<sub>3</sub>OH or 2 M HCl/CD<sub>3</sub>OD, and structural characterization of their reaction products by GC-MS.

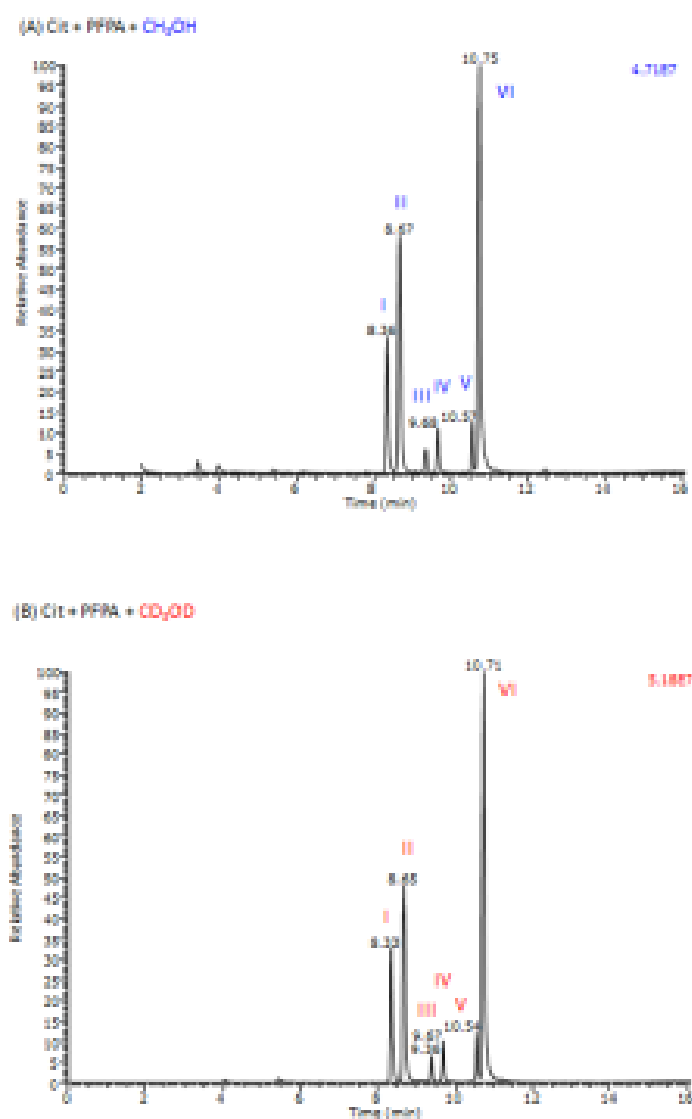

(A1) Cit+ PFPA +  $\text{CH}_3\text{OH}$ : Peak I,  $t_R=8.33$  min

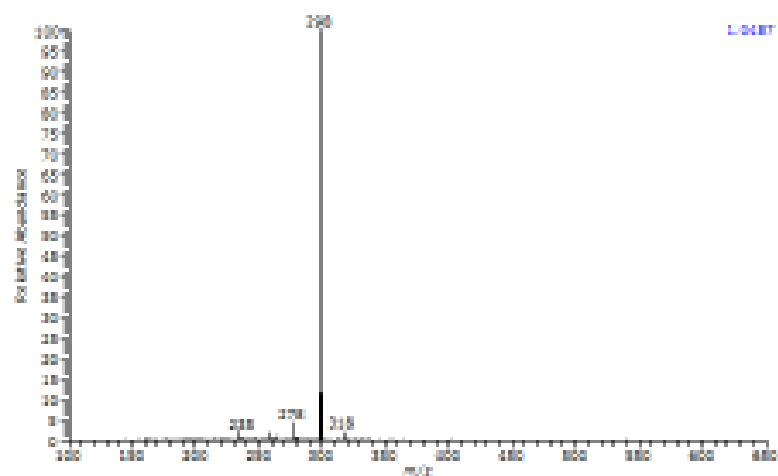

1.3487

Peak I

$t_R$  8.36/8.33

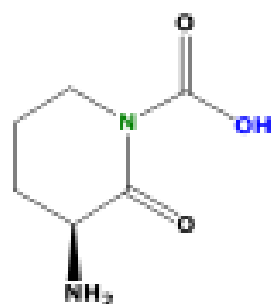

(B1) Cit+ PFPA +  $\text{CD}_3\text{OD}$ : Peak I,  $t_R=8.33$  min

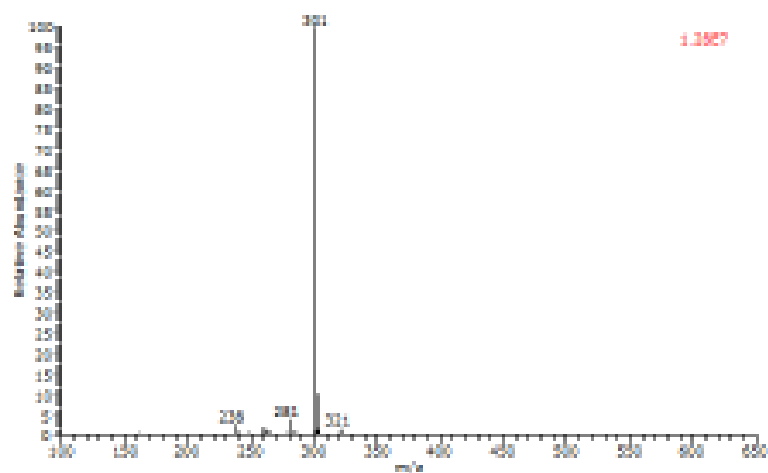

1.3507

(A2) Cit + PFPs +  $\text{CH}_3\text{OH}$ : Peak II,  $t_R=8.87$  min

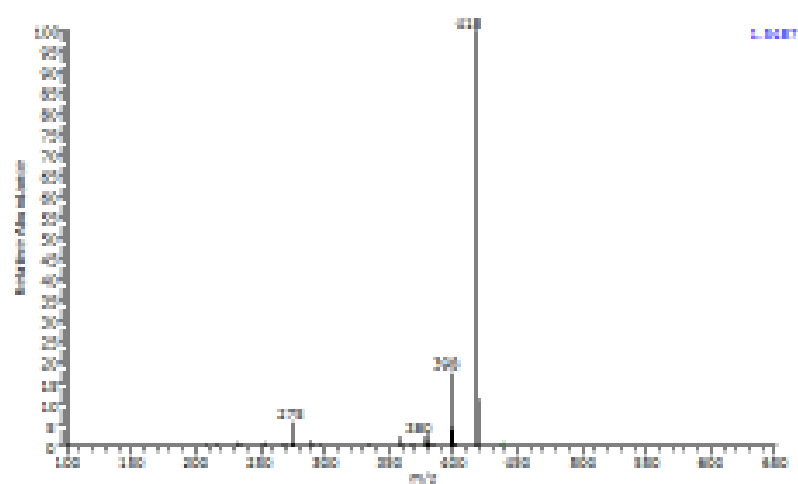

Peak II

Ornithine from Cit

(B2) Cit + PFPs +  $\text{CO}_2\text{O}$ : Peak II,  $t_R=8.63$  min

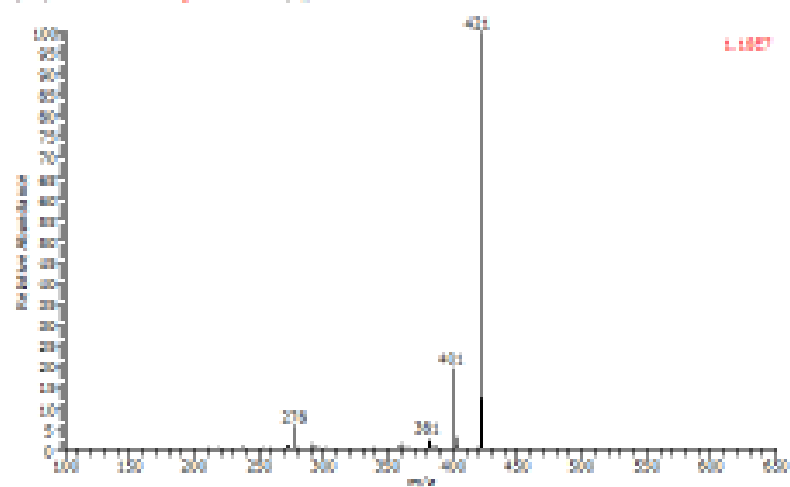

$t_R$  8.67/8.63

(A3) Cit + PFPA +  $\text{CH}_3\text{OH}$ : Peak III,  $t_R=9.36$  min

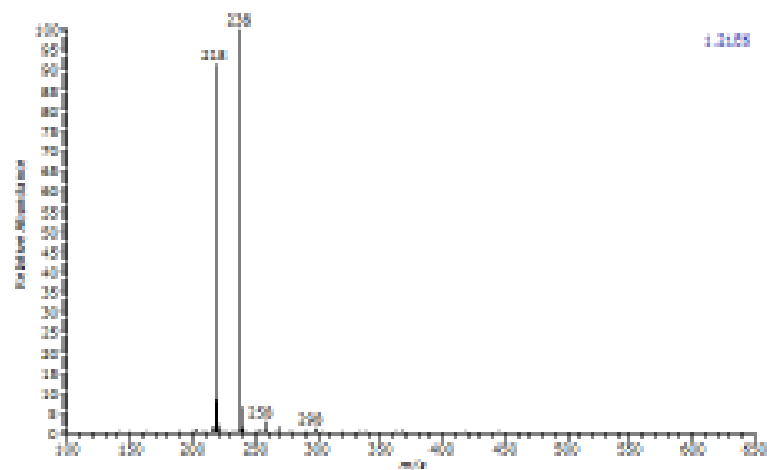

Peak III

$t_R$  9.36/9.36

(B3) Cit + PFPA +  $\text{CD}_3\text{OD}$ : Peak III,  $t_R=9.36$  min

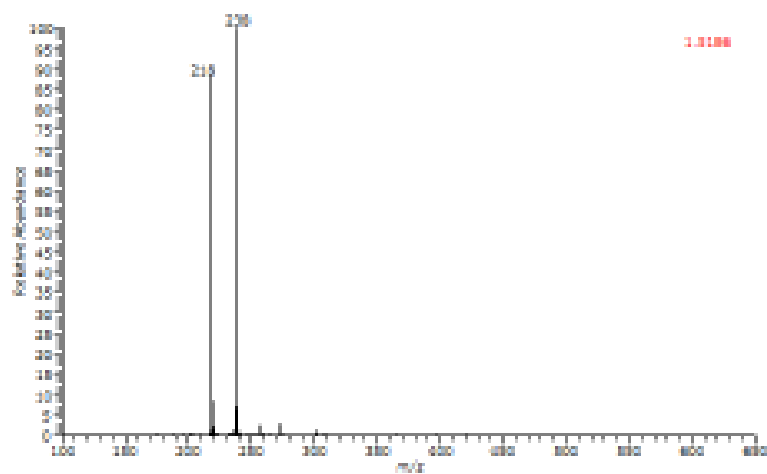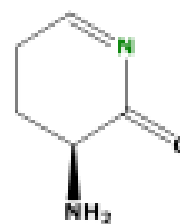

(A4) Cit + PFPA =  $\text{CH}_3\text{OH}$ : Peak IV,  $t_R=9.67$  min

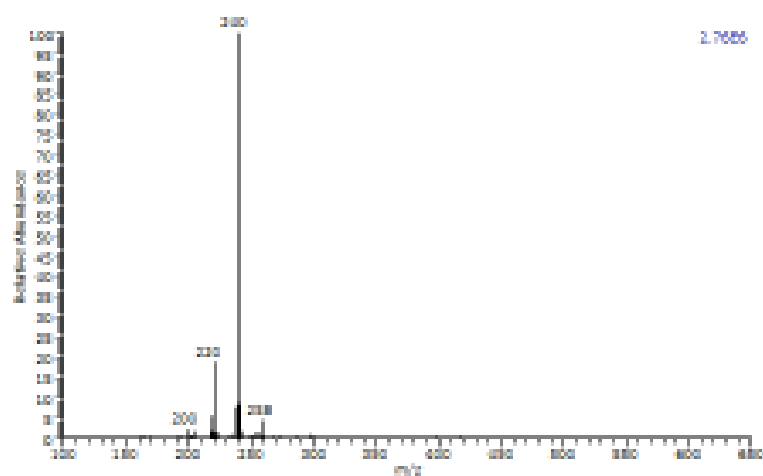

Peak IV

$t_R$  9.67/9.63

(B4) Cit + PFPA =  $\text{CD}_3\text{OD}$ : Peak IV,  $t_R=9.35$  min

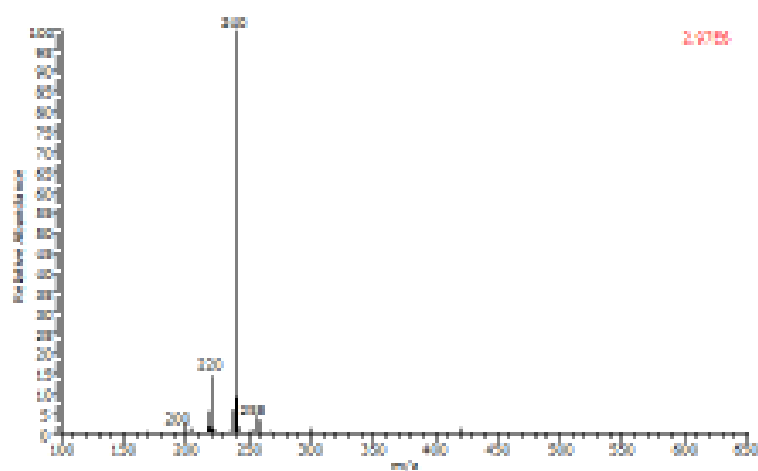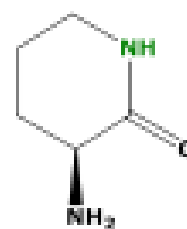

(A5) Cit + PFPA +  $\text{CH}_3\text{OH}$ : Peak V,  $t_R=10.57$  min

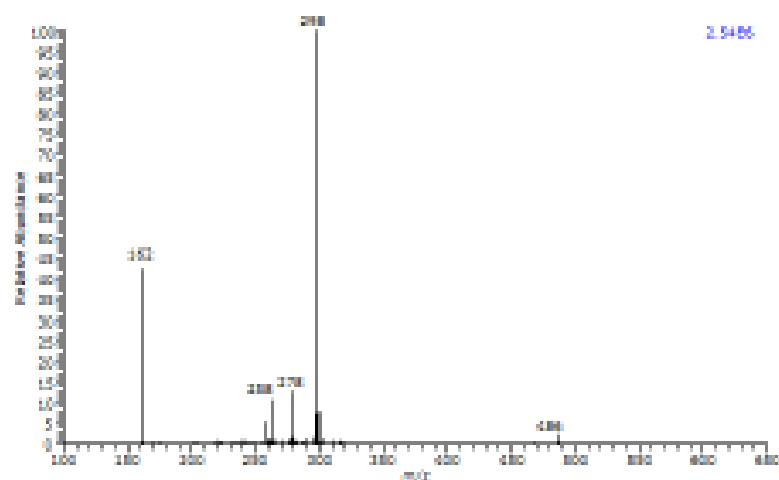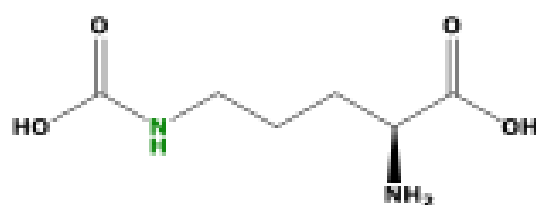

$t_R$  10.57/10.52

from Cit

*N*<sup>6</sup>-Carboxy-Ornithin

(B5) Cit + PFPA +  $\text{CD}_3\text{OD}$ : Peak V,  $t_R=10.54$  min

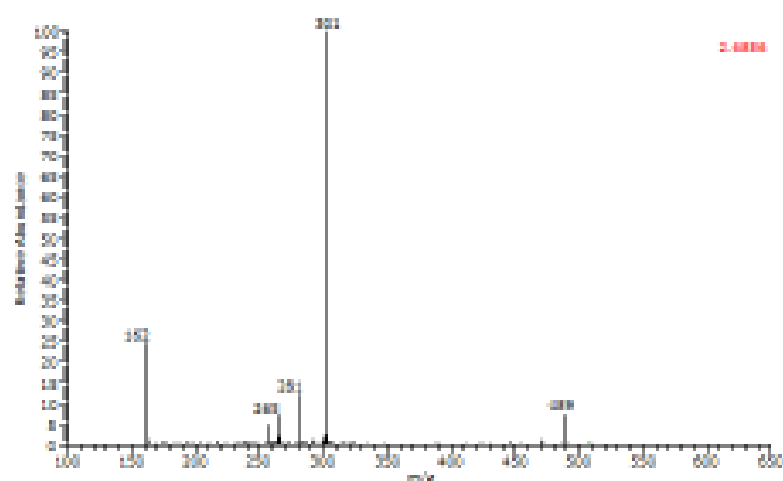

(A6) Cit+ PFPA + CH<sub>3</sub>OH: Peak VI, t<sub>R</sub>=10.75 min

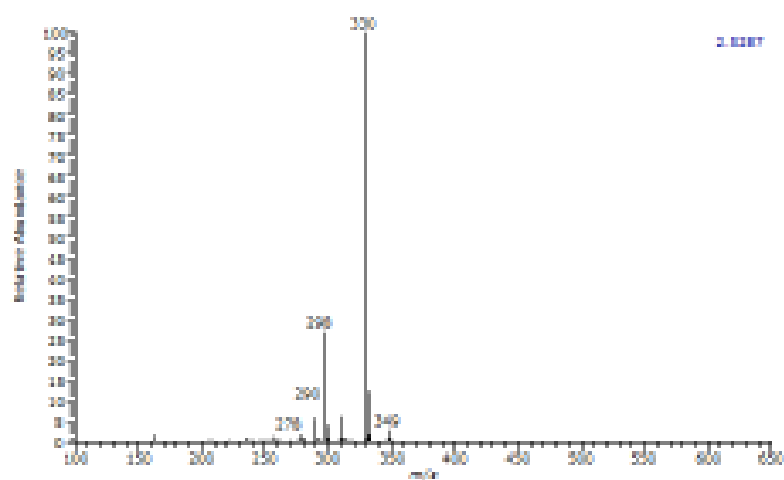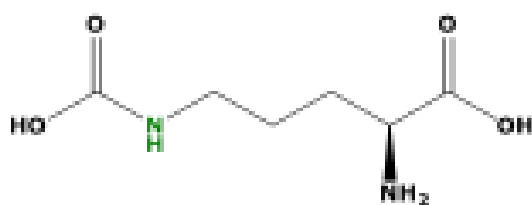

Peak VI

t<sub>R</sub> 10.75/10.71

(B6) Cit+ PFPA + CD<sub>3</sub>OD: Peak VI, t<sub>R</sub>=10.71 min

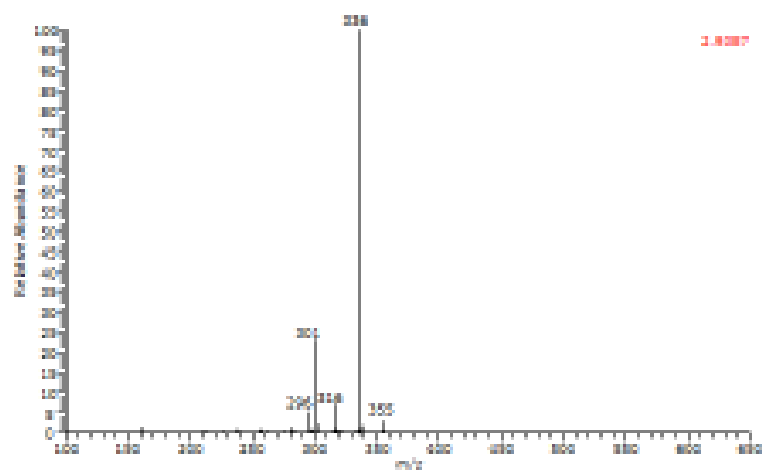



(D) hCit+ PFPA +  $\text{CH}_3\text{OH}$

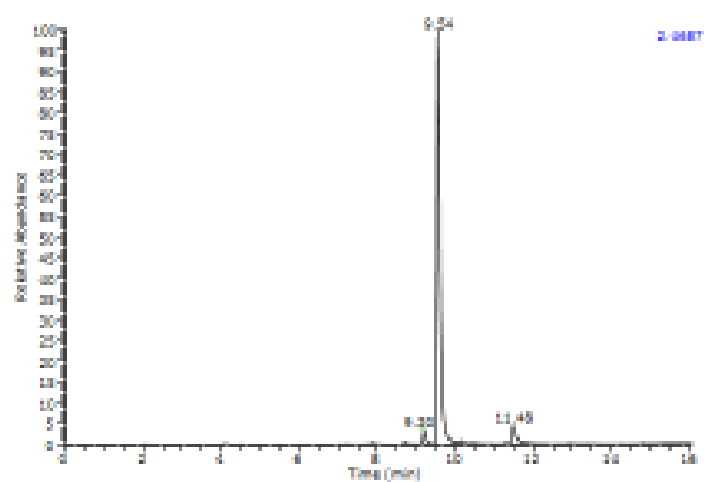

tR 9.54/9.52

Lysine

from hCit

(E) hCit+ PFPA +  $\text{CD}_3\text{OD}$

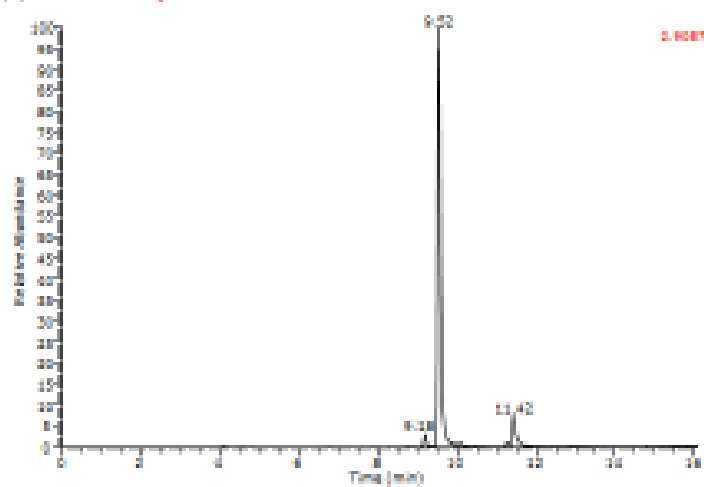

(D1) hCit+ PPA+  $\text{CH}_3\text{OH}$ :  $t_R$ =9.21 min

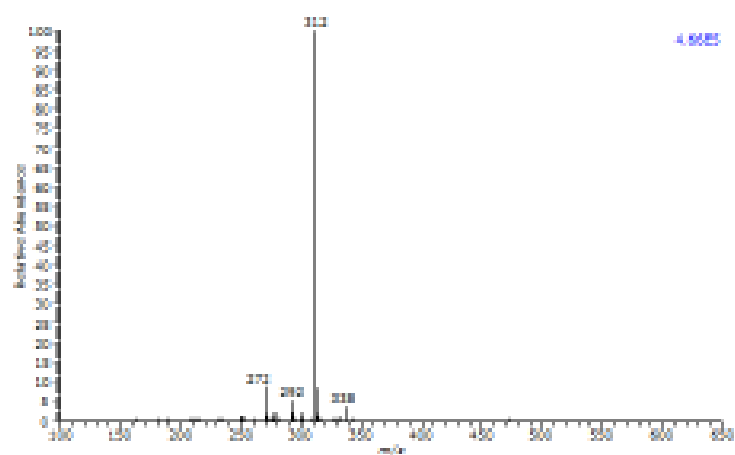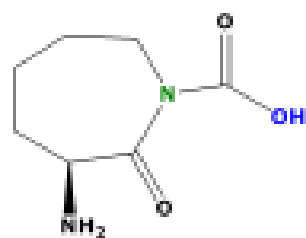

$t_R$  9.21/9.18

from hCit

(E1) hCit+ PPA+  $\text{CD}_3\text{OD}$ :  $t_R$ =9.18 min

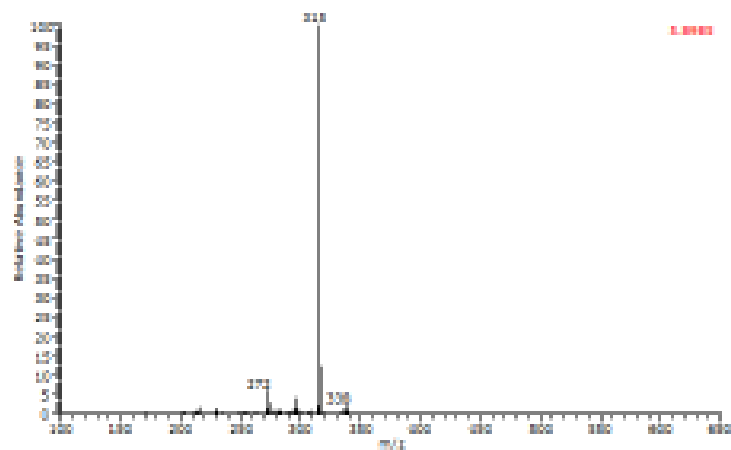

(D3) hCit+ PFPA =  $\text{CH}_2\text{OH}$ :  $t_R$ =11.47 min

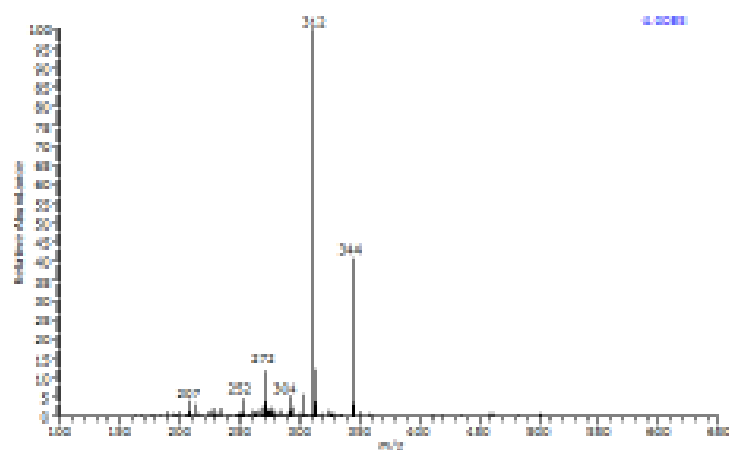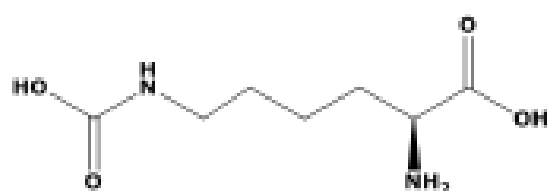

$t_R$  11.47/11.42

from hCit

***N*<sup>6</sup>-carboxy-L-lysine**

(E5) hCit+ PFPA =  $\text{CO}_2\text{CO}$ :  $t_R$ =11.42 min

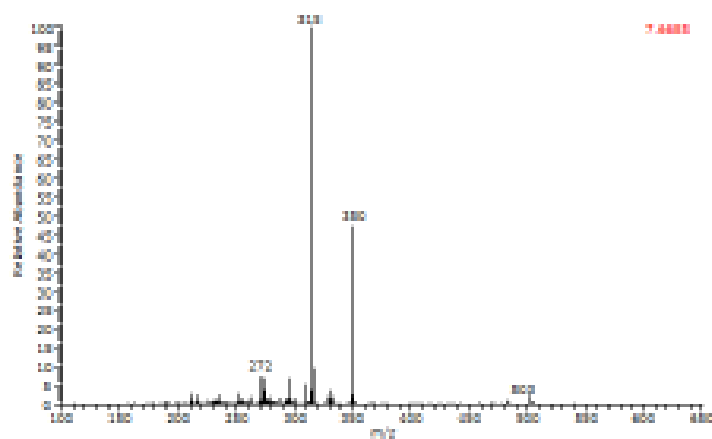

(D8)hCit+PFPA=CH<sub>2</sub>OH: t<sub>R</sub>=11.47 min

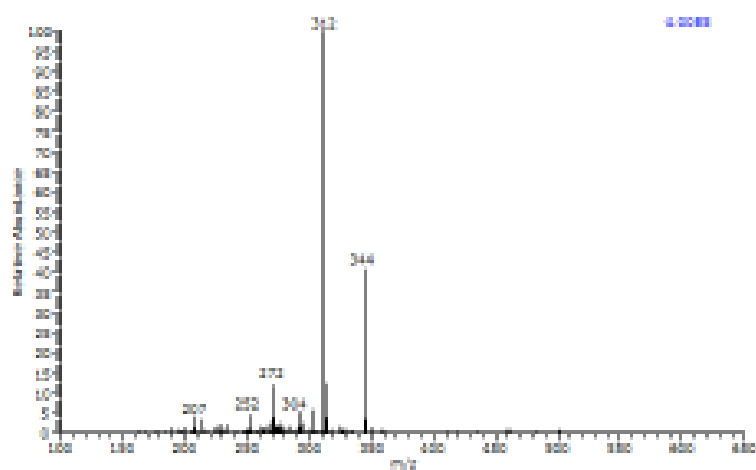

4.3083

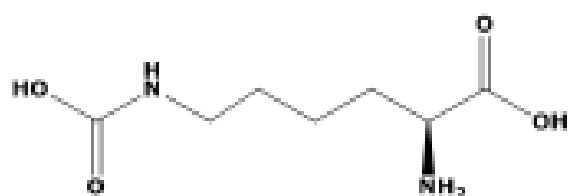

tR 11.47/11.42

from hCit

**N<sup>6</sup>-carboxy-L-lysine**

(E3)hCit+PFPA=CO<sub>2</sub>OO: t<sub>R</sub>=11.42 min

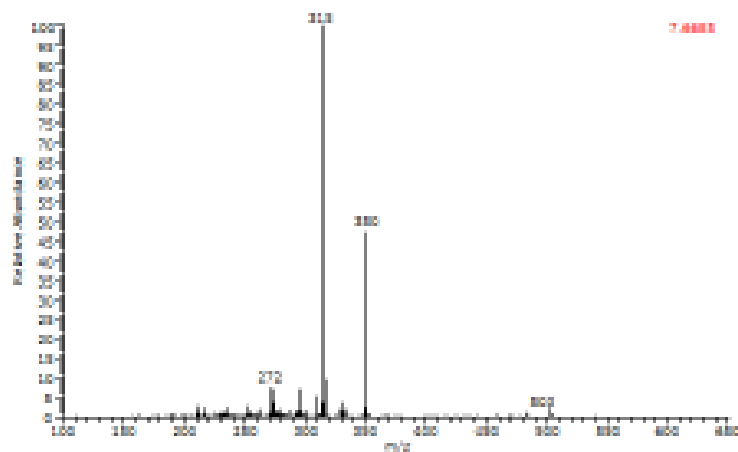

7.8883

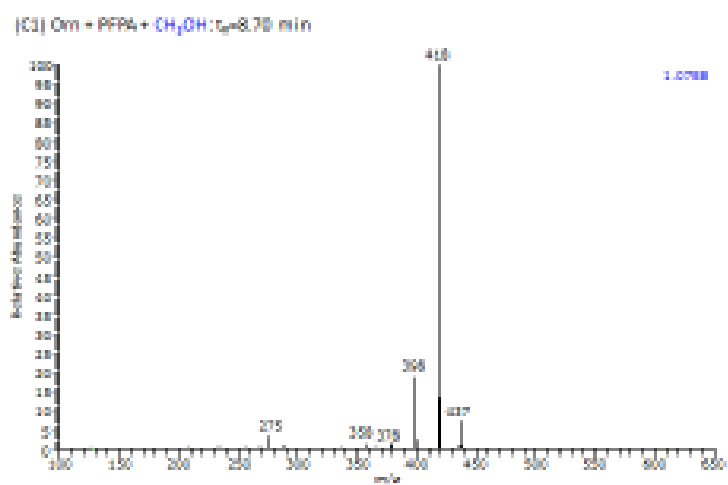

Omithine-Standard

t<sub>R</sub> 8.67/8.63

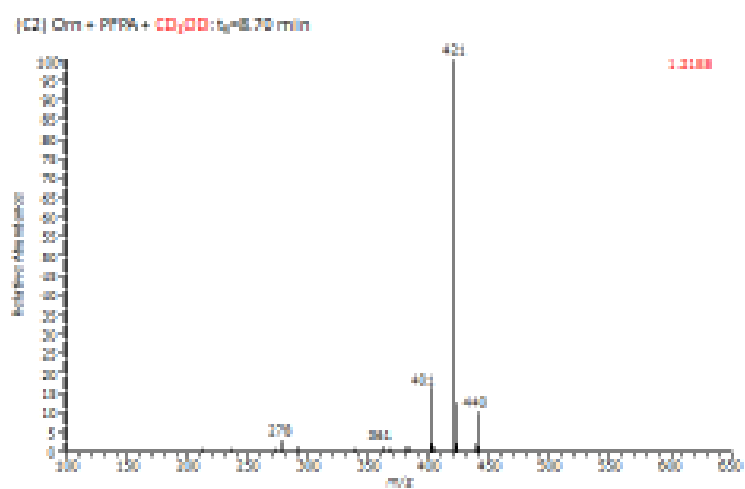

Supplement: s1 [file s1]
